# Supplementary material for: A method for determining the uniquely high molecular weight of chitin extracted from raw shrimp shells using ionic iquids
Source: Royal Society of Chemistry journal article supplement (doi:10.1039/d0gc00753f), 2020-01-01
Supplement: d0gc00753f1.pdf [file d0gc00753f1.pdf]

## Electronic Supplementary Information (ESI)

### A Method for Determining the Uniquely High Molecular Weight of Chitin Extracted from Raw Shrimp Shells Using Ionic Liquids

Hannah Wineinger,<sup>1,†</sup> Julia L. Shamshina,<sup>1,\*</sup> Adrian Kelly,<sup>1</sup> Catherine King,<sup>2,‡</sup> and Robin D. Rogers<sup>3,\*</sup>

<sup>1</sup>*Mari Signum Mid-Atlantic, LLC, 8310 Shell Road, Richmond, VA 23237, USA*

<sup>2</sup>*Department of Chemistry, McGill University, 801 Sherbrooke St. West, Montreal, QC H3A 0B8, Canada*

<sup>3</sup>*525 Solutions, Inc., P. O. Box 2206, Tuscaloosa, AL 35403, USA*

\* Corresponding Authors: Robin D. Rogers, [Robin.Rogers@525Solutions.com](mailto:Robin.Rogers@525Solutions.com), Julia L. Shamshina [Shams002@gmail.com](mailto:Shams002@gmail.com)

## MATERIALS AND METHODS

### Materials

Ionic liquid 1-ethyl-3-methylimidazolium acetate ([C<sub>2</sub>mim][OAc]) was obtained from two suppliers, Iolitec USA (Tuscaloosa, AL, USA), Lot# P01633.4.3-IL-0189, water content 0.52%, 20 kg batch; and Proionic (Grambach, Austria), Lot# 17PI250\_F3, water content 0.11%, 917 kg batch. The shrimp shell biomass was obtained from Mari Signum Dragon Drying facility (Vanceleave, MS) and was dried in an oven overnight and ground to particle size <125 µm prior to use. PG-chitin was obtained from Sigma–Aldrich (St. Louis, MO), catalog number C-7170, Lot # SLBQ6580V and 68H7014, dried and sieved to <125 µm particle size prior to use.

Solvents *N,N*-Dimethylsulfoxide (DMSO) and *N,N*-Dimethylformamide (DMF), both ≥99.8% ACS, produced by VWR Chemicals BDH® were obtained from VWR Canada. *N*-Methyl-2-pyrrolidone (NMP), semi-grade for the electronics industry, supplied by VWR

---

<sup>†</sup> Current Address: Department of Chemistry and Biochemistry, The University of Alabama, Tuscaloosa, AL 35487

<sup>‡</sup> Current Address: Hitachi High Tech Group, Hillsboro, OR 97124-7114

Chemicals BDH<sup>®</sup> was obtained from VWR Canada. Toluene for light scattering instrument calibration was of HPLC grade (purity 99.85%) manufactured by Acros Organics was obtained from VWR, West Chester, PA, catalog number 26837-0010, Lot# B0537317. Toluene was distilled prior to use, and kept under nitrogen, over 3Å molecular sieves dried at 300 °C and cooled to room temperature (RT) under Argon. *N,N*-Dimethylacetamide (DMAc, puriss. p.a., ≥99.5% (GC)) was obtained from Sigma–Aldrich (St. Louis, MO), and kept over 3Å-molecular sieves dried at 300 °C and cooled to RT under Argon. Anhydrous lithium chloride (LiCl, 99.5%) was purchased from Sigma–Aldrich (St. Louis, MO) and dried under vacuum at 60 °C, in an oil bath for 72 h before use.

Sodium hydroxide pellets (purity ≥95.0%) manufactured by Spectrum Chemical Mfg. Corp. were obtained from VWR Canada. Urea (purity 99.0-100%, crystallized ACS, VWR Chemicals BDH<sup>®</sup>) was obtained from VWR Canada. All aforementioned chemicals were used without additional purification unless otherwise noted.

DI water (DI) was obtained from two sources: a commercial Deionization Filter System (Culligan, Northbrook, IL) that provided water with specific resistivity of 16.82 MΩ cm at 25 °C, and an Evoqua Water Technologies' Purification System LDIRS03 (Richmond, VA).

### ***Chitin Extraction***

Exactly 4.001 g of ground biomass (<250 µm particle size) was added to 196.020 g [C<sub>2</sub>mim][OAc], in a 250 mL Erlenmeyer flask. The flask was covered with parafilm and microwaved in a domestic microwave for 6 min total, with 3 s pulses for the first minute, followed by 2 s pulses for the remainder of the time. After each set of pulses, the Erlenmeyer flask was taken out of the microwave and manually swirled in order to evenly distribute biomass, and allow even heat distribution. After 5 min, the sample was tested for crystallization by addition of a small amount (*ca.* 0.5 g) of solution into 50 mL of water. If the sample retained a fibrous structure upon crystallization, the solution was ready for the chitin coagulation step; if the sample's viscosity was too low to retain the fibrous structure, the microwaving was continued in the manner described above.

Before coagulation, the bulk of the solution was transferred into 6 x 50 mL plastic centrifuge test tubes and centrifuged from undissolved minerals using a Sorvall Legend XTR centrifuge (Thermo Electron LED GmbH, Osterode am Harz, Germany). Three centrifugation cycles were

conducted, for 20 min each, at 3800 rpm. Between cycles the sample was reheated to 80 °C in a StableTemp gravity convention oven (Cole Parmer, Vernon Hills, IL) to keep the solution free-flowing for easier removal of any particulate matter.

Once centrifugation was complete, the solution was reheated again to 80 °C to keep it free flowing and then poured into a beaker of DI water (800 mL), for coagulation. When coagulation was complete, the water was decanted, and fresh DI water (800 mL) was added. The DI water was refreshed every hour, to constitute 14 washing cycles total. After washing was complete, the wet chitin was placed into a large crystallizing dish for drying in an 80 °C oven for 24 h until fully dried. The dried chitin was ground to  $\leq 125$   $\mu\text{m}$  size particles and stored in a glass vial.

### ***Various Solvent Systems***

**DMAc/LiCl Method 1:** To prepare DMAc/LiCl (8.0 % w/v LiCl in DMAc), 2.008 g of LiCl was dissolved in 23.405 g (or 24.978 mL) of DMAc, stirred for 2 h and filtered using a syringe VWR Teflon 0.2  $\mu\text{m}$  filter (Catalog # CA97035-174). Then 5.0 mL of this mixture was withdrawn and diluted with 5.4 mL and 3.4 mL of fresh DMAc, to prepare solutions of 4 and 5 % w/v LiCl in DMAc, respectively. After dilution, the solutions were again filtered using the syringe VWR Teflon but now using 0.45  $\mu\text{m}$  filter. For the dissolution, 0.010 g of biopolymer was weighed in a culture vial. Then 5 mL of the DMAc-LiCl mixture (DMAc/4 wt% LiCl) was added and the mixture was stirred vigorously at 40 °C for 2 h. Since complete dissolution was not achieved, the stirring continued but the temperature was increased to 90 °C. The heating continued for 1 week, however, complete dissolution was never achieved. The results are presented in **Table S1, Entries 1 and 2**, for PG- and IL-extracted chitin, respectively.

The dissolution of chitins in DMAc/5 wt% LiCl (see **Table S1, Entries 3 and 4**, for PG and IL-extracted chitin respectively), and DMAc/8 wt% LiCl (see **Table S1, Entries 5 and 6**, for PG and IL-extracted chitin respectively) was conducted in a similar manner with the only exception being the amount of LiCl salt in DMAc/LiCl solution.

**DMAc/LiCl Method 2:** In another set of experiments, 0.010 g of sample was weighed in a beaker. Then 10 mL of DI water was added and the mixture was boiled for 2 h with occasional stirring using a glass rod. The solution was centrifuged and washed three times with 3 mL hot deionized water. The residue was collected in a beaker and 5 mL of methanol was added. The mixture was stirred with a magnetic stirrer for 30 min without heating. The solution was then

centrifuged and washed three times with 3 mL methanol each time. The residue was collected and soaked in fresh DMAc for 30 min with stirring. The resulting solution was centrifuged and washed three times with 3 mL DMAc each time. The residue was collected to be used later.

To prepare DMAc/LiCl (8.0 % w/v LiCl in DMAc), 2.008 g of LiCl was dissolved in 23.405 g (or 24.978 mL) of DMAc, stirred for 2 h and filtered using a syringe VWR Teflon 0.2  $\mu$ m filter. To the chitin “residue”, 5 mL of freshly prepared 8% w/v LiCl in DMAc (0.8 g LiCl in 10 mL DMAc) was added. The mixture was stirred continuously and heated at 40 °C for 2 h. Since complete dissolution was not achieved within 2 h, the stirring was continued and the temperature increased to 90 °C. The heating continued for 1 week. The results are presented in **Table S1**, **Entries 7 and 8**, for PG- and IL-extracted chitin, respectively. The results are presented in **Table S1**.

**NaOH/urea aqueous system 8 wt%/4 wt%/88 wt% NaOH/urea/deionized (DI) water:** NaOH/urea aqueous systems of 8 wt%/4 wt%/88 wt% NaOH/urea/deionized (DI) water were prepared through dissolution of 8.004 g pelleted NaOH in 88.123 mL of DI water under stirring for 2 hours at room temperature, followed by addition of 4.006 g urea. Freshly-prepared NaOH/urea aqueous system was used to dissolve 0.5 wt% of each (PG- or IL-extracted) biopolymer by freeze/thaw (F/T) treatment as follows: exactly 0.010 g of biopolymer powder was added to 1.985 g of NaOH/urea aqueous system in a vial and the mixture was stirred at room temperature for 2 min. The mixture was then frozen by immersing the vial in a dry ice/ethanol cold bath (ca. -72 °C) for 3 min, followed by thawing at room temperature (ca. 8 min) and subsequent vigorous stirring (5 min). The F/T cycles were repeated several times to achieve full dissolution. The results are presented in **Table S1**, **Entries 9, 10 and 11, 12**, for PG- and IL-extracted chitin, respectively. If the biopolymer was not dissolved after 20 F/T cycles, it was then designated as insoluble.

**[C<sub>2</sub>mim][OAc] – DMAc 1:1 v/v, 1:0.50 v/v, 1:0.25 v/v, and 1:0.1 v/v** were only used on IL-extracted chitin as follows: 0.010 g of polymer was dissolved in [C<sub>2</sub>mim][OAc] as follows. For direct dissolution, IL (~5 mL) followed by IL-extracted chitin (0.010 g) were weighed with a microbalance (Secura 125-1S, Sartorius Lab Instruments GMBH, Goettingen, Germany) into 4-dram screw top vials (VWR supplies, model number V2757C-FM-SP, catalog number 470146-668), equipped with a Teflon-coated stir bar, capped, and protected from water absorption with parafilm wrapped around the top. The vials were placed onto a hotplate stirrer (Talboys-

Troemner, Thorofare, NJ) and stirred in a heated (90 °C) oil bath for 48 h, until complete dissolution of the polymer was obtained. After that, solutions were allowed to cool to RT, and while continuing to be stirred, 5.0, 1.7, 0.88 mL, and 0.26 mL of DMAc were added at once, to prepare solutions IL/DMAc 50:50 v/v, 75:25 v/v, 85:15 v/v, and 95:5 v/v. The results are presented in **Table S1 (Entries 13, 14, 15, 16)** and **Figures S1 - S2**.

**[C<sub>2</sub>mim][OAc] – DMF (Table 1, Entries 17 – 20); [C<sub>2</sub>mim][OAc] – NMP (Table 1, Entries 21 – 24); [C<sub>2</sub>mim][OAc] – DMSO (Table 1, Entries 25 – 28)** in a ratio 50:50 v/v, 75:25 v/v, 85:15 v/v, and 95:5 v/v were prepared and tested as described above for the **[C<sub>2</sub>mim][OAc] – DMAc** solvent system.

**Table S1.** Solvent Systems Attempted for Dissolution of Chitin

| #  | Solvent System                                    | Chitin Type  | Chitin Load, wt% (mg/mL) | Dissolution Conditions                                                                                                 | Result          |
|----|---------------------------------------------------|--------------|--------------------------|------------------------------------------------------------------------------------------------------------------------|-----------------|
| 1  | DMAc/4 wt% LiCl                                   | PG           | 0.5 wt% (~5 mg/mL)       | Dissolution in the selected solvent for up to 1 week, at 90 °C                                                         | Not solubilized |
| 2  | DMAc/4 wt% LiCl                                   | IL-extracted | 0.5 wt% (~5 mg/mL)       | Dissolution in the selected solvent for up to 1 week, at 90 °C                                                         | Not solubilized |
| 3  | DMAc/5 wt% LiCl                                   | PG           | 0.5 wt% (~5 mg/mL)       | Dissolution in the selected solvent for up to 1 week, at 90 °C                                                         | Not solubilized |
| 4  | DMAc/5 wt% LiCl                                   | IL-extracted | 0.5 wt% (~5 mg/mL)       | Dissolution in the selected solvent for up to 1 week, at 90 °C                                                         | Not solubilized |
| 5  | DMAc/8 wt% LiCl                                   | PG           | 0.5 wt% (~5 mg/mL)       | Dissolution in the selected solvent for up to 1 week, at 90 °C                                                         | Not solubilized |
| 6  | DMAc/8 wt% LiCl                                   | IL-extracted | 0.5 wt% (~5 mg/mL)       | Dissolution in the selected solvent for up to 1 week, at 90 °C                                                         | Not solubilized |
| 7  | DMAc/8 wt% LiCl                                   | PG           | 0.5 wt% (~5 mg/mL)       | Chitin activated in DMAc by stirring 2 days followed by dissolution in the selected solvent for up to 1 week, at 90 °C | Solubilized     |
| 8  | DMAc/8 wt% LiCl                                   | IL-extracted | 0.5 wt% (~5 mg/mL)       | Chitin activated in DMAc by stirring 2 days followed by dissolution in the selected solvent for up to 1 week, at 90 °C | Not solubilized |
| 9  | 8 wt%/4 wt%/88 wt% NaOH/urea/deionized (DI) water | PG           | 0.5 wt% (5 mg/g)         | 5 freeze-thaw cycles                                                                                                   | Not solubilized |
| 10 | 8 wt%/4 wt%/88 wt% NaOH/urea/deionized (DI) water | PG           | 0.5 wt% (5 mg/g)         | 10 freeze-thaw cycles                                                                                                  | Solubilized     |

|    |                                                   |              |                    |                                                            |                                    |
|----|---------------------------------------------------|--------------|--------------------|------------------------------------------------------------|------------------------------------|
| 11 | 8 wt%/4 wt%/88 wt% NaOH/urea/deionized (DI) water | IL-extracted | 0.5 wt% (5 mg/g)   | 10 freeze-thaw cycles                                      | Not solubilized                    |
| 12 | 8 wt%/4 wt%/88 wt% NaOH/urea/deionized (DI) water | IL-extracted | 0.5 wt% (5 mg/g)   | 20 freeze-thaw cycles                                      | Not solubilized                    |
| 13 | [C <sub>2</sub> mim][OAc] – DMAc 50:50 v/v        | IL-extracted | 0.5 wt% (~5 mg/mL) | Dissolution in the IL, followed by addition of a cosolvent | Polymer precipitated from solution |
| 14 | [C <sub>2</sub> mim][OAc] – DMAc 75:25 v/v        | IL-extracted | 0.5 wt% (~5 mg/mL) | Dissolution in the IL, followed by addition of a cosolvent | Polymer precipitated from solution |
| 15 | [C <sub>2</sub> mim][OAc] – DMAc 85:15 v/v        | IL-extracted | 0.5 wt% (~5 mg/mL) | Dissolution in the IL, followed by addition of a cosolvent | Polymer precipitated from solution |
| 16 | [C <sub>2</sub> mim][OAc] – DMAc 95:5 v/v         | IL-extracted | 0.5 wt% (~5 mg/mL) | Dissolution in the IL, followed by addition of a cosolvent | Polymer precipitated from solution |
| 17 | [C <sub>2</sub> mim][OAc] – DMF 50:50 v/v         | IL-extracted | 0.5 wt% (5 mg/mL)  | Dissolution in the IL, followed by addition of a cosolvent | Polymer precipitated from solution |
| 18 | [C <sub>2</sub> mim][OAc] – DMF 75:25 v/v         | IL-extracted | 0.5 wt% (~5 mg/mL) | Dissolution in the IL, followed by addition of a cosolvent | Polymer precipitated from solution |
| 19 | [C <sub>2</sub> mim][OAc] – DMF 85:15 v/v         | IL-extracted | 0.5 wt% (~5 mg/mL) | Dissolution in the IL, followed by addition of a cosolvent | Polymer precipitated from solution |
| 20 | [C <sub>2</sub> mim][OAc] – DMF 95:5 v/v          | IL-extracted | 0.5 wt% (~5 mg/mL) | Dissolution in the IL, followed by addition of a cosolvent | Polymer precipitated from solution |
| 21 | [C <sub>2</sub> mim][OAc] – NMP 50:50 v/v         | IL-extracted | 0.5 wt% (~5 mg/mL) | Dissolution in the IL, followed by addition of a cosolvent | Polymer precipitated from solution |
| 22 | [C <sub>2</sub> mim][OAc] – NMP 75:25 v/v         | IL-extracted | 0.5 wt% (~5 mg/mL) | Dissolution in the IL, followed by addition of a cosolvent | Polymer precipitated from solution |
| 23 | [C <sub>2</sub> mim][OAc] – NMP 85:15 v/v         | IL-extracted | 0.5 wt% (~5 mg/mL) | Dissolution in the IL, followed by addition of a cosolvent | Polymer precipitated from solution |
| 24 | [C <sub>2</sub> mim][OAc] – NMP 95:5 v/v          | IL-extracted | 0.5 wt% (~5 mg/mL) | Dissolution in the IL, followed by addition of a cosolvent | Polymer precipitated from solution |
| 25 | [C <sub>2</sub> mim][OAc] – DMSO 50:50 v/v        | IL-extracted | 0.5 wt% (~5 mg/mL) | Dissolution in the IL, followed by addition of a cosolvent | Polymer precipitated from solution |
| 26 | [C <sub>2</sub> mim][OAc] – DMSO 75:25 v/v        | IL-extracted | 0.5 wt% (~5 mg/mL) | Dissolution in the IL, followed by addition of a cosolvent | Polymer precipitated from solution |
| 27 | [C <sub>2</sub> mim][OAc] – DMSO 85:15 v/v        | IL-extracted | 0.5 wt% (~5 mg/mL) | Dissolution in the IL, followed by addition of a cosolvent | Polymer precipitated from solution |
| 28 | [C <sub>2</sub> mim][OAc] – DMSO 95:5 v/v         | IL-extracted | 0.5 wt% (~5 mg/mL) | Dissolution in the IL, followed by addition of a cosolvent | Polymer precipitated from solution |

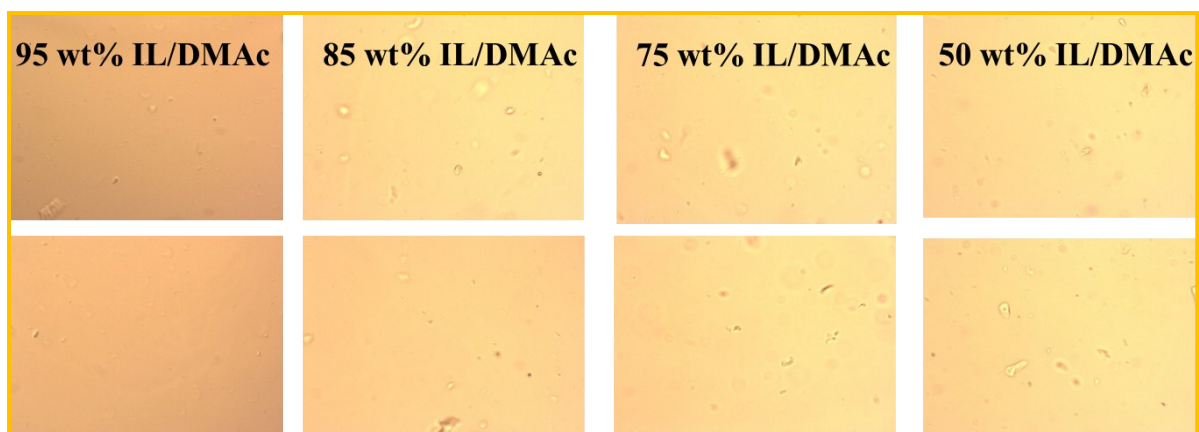

**Figure S1.** Microscopy images of the IL-extracted chitin in IL/DMAc showing undissolved polymer particles

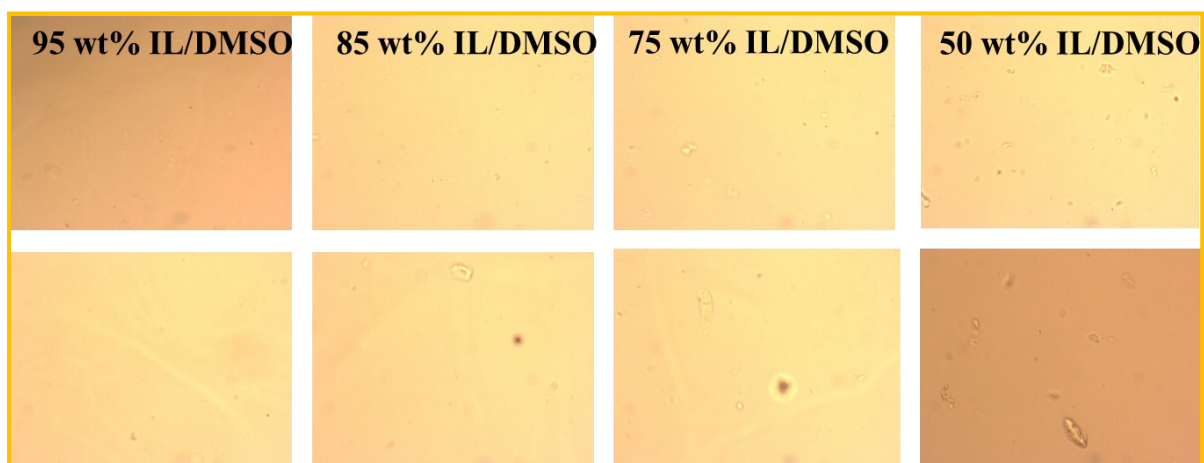

**Figure S2.** Microscopy images of the IL-extracted chitin in IL/DMSO showing undissolved polymer particles

## ***Light Scattering***

### ***Solution Preparation***

#### ***Method 1: Heating of Individual Chitin Samples in the IL***

Each set of sample solutions was prepared using either direct dissolution of chitin at each concentration or consecutive dilutions of stock chitin solution. For direct dissolution, IL (~5 g) followed by IL-extracted or PG-chitin (0.0004 to 0.0040 g/g solution) was weighed with a microbalance (Secura 125-1S, Sartorius Lab Instruments GMBH, Goettingen, Germany) into 4-dram screw top vials (VWR supplies, model number V2757C-FM-SP, catalog number 470146-668). One 5 g sample of the neat IL (not loaded with chitin) was likewise weighed into an empty vial. All vials were equipped with a Teflon-coated stir bar, capped, and protected from water absorption from air with parafilm wrapped around the top. The vials were placed onto a hotplate stirrer (Talboys - Troemner, Thorofare, NJ) and stirred for 30 min, to ensure good mixing and to prevent any fine solids from falling to the bottom of the vial. The vials were then placed into a preheated (90 °C) in-house made aluminum heating block with 9 or 12 cylindrical holes (27 mm diameter) deep enough to surround all liquid inside the vials; one 3 mm-diameter hole was dedicated for positioning of a thermocouple. The samples were heated at 90 °C for 48 h while stirring, until complete dissolution of the polymer was obtained. Adequate stirring of the samples during dissolution appeared to be critical to eliminate polymer gelation and ensure even dissolution between vials. Chitin sample concentration (c) was calculated as mass of chitin divided by total mass of solution and expressed in g/g. The example of these samples is presented in **Table S2**, below.



**Table S2.** Solution Preparation for Light Scattering by Heating of Individual Chitin

Samples in the IL

| # | Chitin | Weight of Chitin Powder (g) | Weight of Chitin Powder + IL (g) | Concentration Chitin in the IL (g/g) |
|---|--------|-----------------------------|----------------------------------|--------------------------------------|
| 1 | PG     | 0.0016                      | 5.0006                           | 0.000318                             |
| 2 | PG     | 0.0027                      | 5.0068                           | 0.000539                             |
| 3 | PG     | 0.0030                      | 5.0095                           | 0.000589                             |
| 4 | PG     | 0.0047                      | 5.0135                           | 0.000931                             |
| 5 | PG     | 0.0151                      | 4.9969                           | 0.003018                             |
| 6 | PG     | 0.0197                      | 5.0155                           | 0.003932                             |

***Method 2: Solution Preparation by Serial Dilution of ‘Stock’ Chitin Sample***

A stock solution of concentration 0.020 g/g (PG-chitin and IL-Extracted Chitin) was prepared by direct dissolution of chitin in the IL. For the PG-chitin stock solution, 0.200 g chitin was heated in 9.801 g of the IL, in a 100 °C oil bath while stirring for 48 h. For the IL-chitin stock solution, 0.200 g chitin was heated in 9.803 g of the IL. Simultaneously, neat IL for use when diluting the stock concentration was heated in the same oil bath while stirring for consistency. The heated IL was weighed directly into the 4-dram vials, followed by increasing increments of the stock solution to obtain solutions of concentration 0.0009 to 0.009 g/g solution. Chitin solution concentration (c) was calculated as the multiplication of the concentration of the stock solution (in g/g) and the mass of stock solution divided by total mass of solution and expressed in g/g.

**Table S3.** Solution Preparation for Light Scattering Measurements

| #                           | Chitin                    | Weight of Stock Solution <sup>a</sup> or Solid Chitin <sup>c</sup> (g) | Total Weight of Solution (g) | Concentration Chitin in the IL (g/g) | SLS Measurement                            |
|-----------------------------|---------------------------|------------------------------------------------------------------------|------------------------------|--------------------------------------|--------------------------------------------|
| <b>PG Trial 1</b>           |                           |                                                                        |                              |                                      |                                            |
| 1                           | PG <sup>a</sup>           | 0.14032                                                                | 3.15299                      | 0.00093                              |                                            |
| 2                           | PG <sup>a</sup>           | 0.23060                                                                | 3.23321                      | 0.00153                              | Excluded from SLS measurement <sup>b</sup> |
| 3                           | PG <sup>a</sup>           | 0.39061                                                                | 3.39748                      | 0.00258                              |                                            |
| 4                           | PG <sup>a</sup>           | 0.45152                                                                | 3.44984                      | 0.00300                              | Excluded from SLS measurement <sup>b</sup> |
| 5                           | PG <sup>a</sup>           | 0.50578                                                                | 3.50897                      | 0.00335                              |                                            |
| 6                           | PG <sup>a</sup>           | 0.74710                                                                | 3.75606                      | 0.00493                              |                                            |
| <b>PG Trial 2</b>           |                           |                                                                        |                              |                                      |                                            |
| 7                           | PG <sup>c</sup>           | 0.01062                                                                | 10.09473                     | 0.001052                             | Excluded from SLS measurement <sup>b</sup> |
| 8                           | PG <sup>c</sup>           | 0.01517                                                                | 10.12073                     | 0.001499                             |                                            |
| 9                           | PG <sup>c</sup>           | 0.02029                                                                | 10.16188                     | 0.001997                             |                                            |
| 10                          | PG <sup>c</sup>           | 0.03051                                                                | 10.14172                     | 0.003008                             |                                            |
| 11                          | PG <sup>c</sup>           | 0.04082                                                                | 10.13092                     | 0.004029                             |                                            |
| <b>PG Trial 3</b>           |                           |                                                                        |                              |                                      |                                            |
| 12                          | PG <sup>c</sup>           | 0.01084                                                                | 10.06539                     | 0.001076                             |                                            |
| 13                          | PG <sup>c</sup>           | 0.01611                                                                | 10.18359                     | 0.001581                             | Excluded from SLS measurement <sup>b</sup> |
| 14                          | PG <sup>c</sup>           | 0.02103                                                                | 10.18503                     | 0.002064                             |                                            |
| 15                          | PG <sup>c</sup>           | 0.02948                                                                | 10.25663                     | 0.002874                             |                                            |
| 16                          | PG <sup>c</sup>           | 0.04280                                                                | 10.07039                     | 0.004250                             |                                            |
| 17                          | PG <sup>c</sup>           | 0.05194                                                                | 10.31694                     | 0.005034                             | Excluded from SLS measurement <sup>b</sup> |
| 18                          | PG <sup>c</sup>           | 0.06289                                                                | 10.44675                     | 0.006020                             | No measurement taken <sup>d</sup>          |
| <b>IL-Extracted Trial 1</b> |                           |                                                                        |                              |                                      |                                            |
| 20                          | IL-Extracted <sup>c</sup> | 0.01079                                                                | 10.24308                     | 0.001053                             |                                            |
| 21                          | IL-Extracted <sup>c</sup> | 0.01537                                                                | 10.09789                     | 0.001522                             | Excluded from SLS measurement <sup>b</sup> |
| 22                          | IL-Extracted <sup>c</sup> | 0.02031                                                                | 10.17426                     | 0.001996                             |                                            |
| 23                          | IL-Extracted <sup>c</sup> | 0.03018                                                                | 10.18241                     | 0.002964                             |                                            |
| 24                          | IL-Extracted <sup>c</sup> | 0.04032                                                                | 10.14278                     | 0.003975                             |                                            |
| <b>IL-Extracted Trial 2</b> |                           |                                                                        |                              |                                      |                                            |
| 25                          | IL-Extracted <sup>c</sup> | 0.01047                                                                | 10.22778                     | 0.001025                             |                                            |
| 26                          | IL-Extracted <sup>c</sup> | 0.02082                                                                | 10.22408                     | 0.002036                             |                                            |
| 27                          | IL-Extracted <sup>c</sup> | 0.02540                                                                | 10.26518                     | 0.002474                             | Excluded from SLS measurement <sup>b</sup> |
| 28                          | IL-Extracted <sup>c</sup> | 0.03015                                                                | 10.14863                     | 0.002971                             |                                            |
| 29                          | IL-Extracted <sup>c</sup> | 0.03528                                                                | 10.27731                     | 0.003433                             |                                            |

<sup>a</sup>Samples prepared *via* serial dilution of stock solution; <sup>b</sup>Excluded from SLS measurements due to significant color difference from the rest of the samples; <sup>c</sup>Samples prepared *via* direct dissolution of chitin into IL in separate vials;

<sup>d</sup>High viscosity solutions cannot be measured accurately.

### ***Evaluation of the Refractive Index (n)***

An Abbemat 500 refractometer (Anton Paar, Ashland, USA) was used to measure refractive index. The refractometer was allowed to equilibrate to 25 °C after the sample cell was rinsed with acetone, and wiped with KIMTECH Kimwipes® Low-Lint Wipers (4.4 x 8.4”) supplied by ULINE. The refractometer was then calibrated at 25 °C using DI water. To measure refractive index, enough of each solution was added to cover the optics. The solutions were allowed to sit for 120 s to equilibrate at 25 °C, and the refractive index was measured once per minute until a stable value of  $n$  was obtained.

### ***Determination of the Refractive Index Increment ( $dn/dc$ )***

Plots of  $n$  as a function of chitin concentration ( $c$ ) were constructed. The slopes of these lines were calculated and recorded as  $dn/dc$ .

### ***Viscosity Measurements***

Viscosity measurements were conducted on a ViscoLab-4000 viscometer (PAC LP, Houston, TX) at 25 °C, using the 50-1000 cP piston. For heating the viscometer to 25 °C, an electric heating pad was wrapped around the steel chamber of the viscometer.

### ***Static Light Scattering (SLS)***

#### ***Materials***

Rectangular glass cuvettes (World Precision Instruments, standard optical glass cuvettes, open-top type, Teflon lid, thickness 1.25 mm x 2, light path 10 mm, volume 3.5 mL, outside dimensions 45 mm × 12.5 mm × 12.5 mm; spectral range 350-2500 nm) were used for all measurements.

#### ***Method***

The molecular weights of chitin samples were determined by the SLS technique using a Zetasizer Nano ZS (Malvern Instruments, Inc., Westborough, MA) at 25 °C with a laser wavelength of 633 nm and a scattering angle of 173°. Prior to the measurements the power performance (laser power) of the instrument was checked with a toluene scattering standard with

known Rayleigh ratio to allow the system to be characterized at all attenuation levels and normalize sample scattering accordingly. For that, anhydrous, distilled toluene was placed into a glass cuvette and the scattering was measured in back scattering mode with the attenuator's setting consecutively changed from 1 to 11. (Note: The Rayleigh ratio of toluene is known to be  $R_{\text{Tol}}: 1.35 \times 10^{-5} \text{ cm}^{-1}$ , and the refractive index  $n_{\text{Tol}}$  is 1.4909.) The results are presented below in **Table S4**.

**Table S4.** Calculation of Attenuation Factor

| Attenuation | Counts/s | Attenuation Factor |
|-------------|----------|--------------------|
| 11          | 218.40   | 1                  |
| 10          | 67.00    | 0.3067             |
| 9           | 23.00    | 0.1060             |
| 8           | 10.00    | 0.0436             |
| 7           | 2.45     | 0.0126             |

The standard operation procedures of the instrument were set to prompt the operator to enter sample viscosity first, and then specify the measurement temperature (25 °C). Measurement type was set to manual, with 10 runs/measurement, 10 s run duration, and 10 total measurements. The delay between measurements was set to 10 s. The following parameters were used for the IL dispersant: Solvent:  $[\text{C}_2\text{mim}][\text{OAc}]$ ;  $T = 25 \text{ }^\circ\text{C}$  (120 s equilibration time at this temperature prior to measurement); Dispersant's viscosity: 151 cP; Dispersant's refractive index ( $n$ ) 1.502.

After all samples were recorded, the IL scattering was also determined using the same treatment and measurement conditions that were used for the IL-chitin samples. The IL was heated together with the samples, placed into a glass cuvette, and the scattering was measured in the back scattering mode with the attenuator set at 11 (no attenuation) so that IL scattering could be subtracted from overall value.

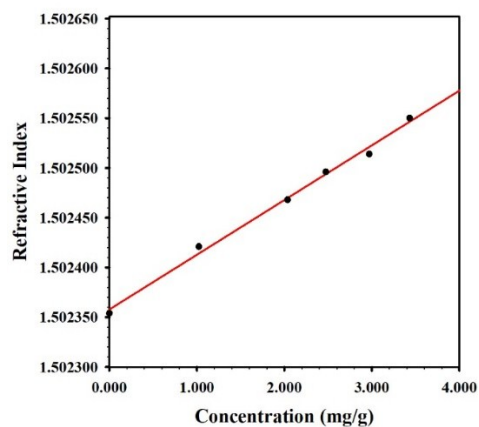

dn/dc 0.055 ( $R^2$  0.995)

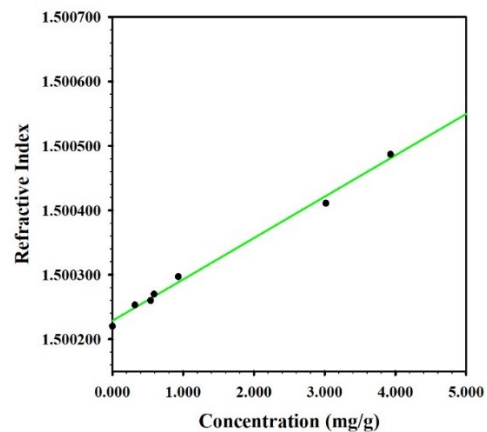

dn/dc 0.064 ( $R^2$  0.994)

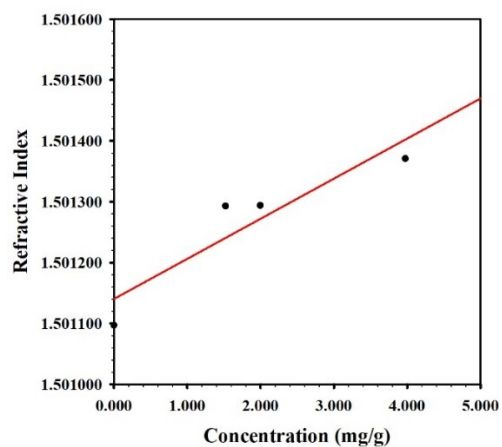

dn/dc 0.066 ( $R^2$  0.852)

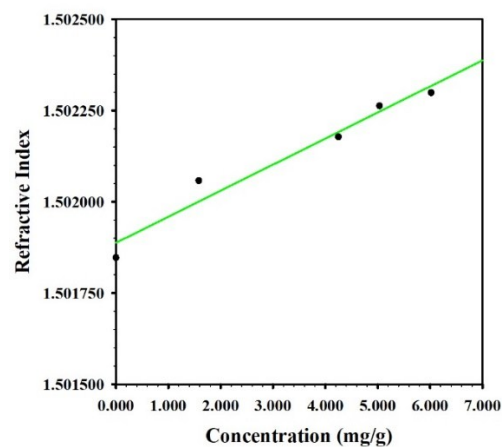

dn/dc 0.071 ( $R^2$  0.957)

ND

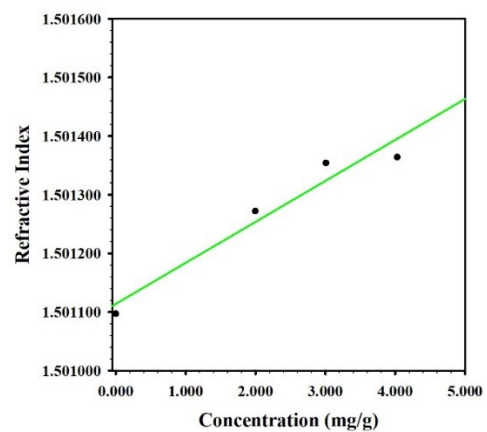

dn/dc 0.070 ( $R^2$  0.945)

**Figure S3.** Refractive index measurements. The slope of the plot defines dn/dc; IL-extracted chitin on the left (red) and PG-chitin on the right (green).

**Table S5.** Laser Parameters and Toluene Standard

| Parameter                              | Values                |
|----------------------------------------|-----------------------|
| Wavelength (nm):                       | 633.0                 |
| T (°C):                                | 25.0                  |
| Solvent $n_0$ :                        | 1.5024                |
| $R_{\text{Tol}}$ ( $\text{cm}^{-1}$ ): | $1.35 \times 10^{-5}$ |
| $n_{\text{Tol}}$ :                     | 1.4909                |
| Optical Constant Toluene (K):          | $1.07 \times 10^{-8}$ |
| Tol/Solv Int Ratio:                    | 0.3                   |

**Table S6.** Refractive Index Increment (dn/dc)

| Chitin type  | dn/dc                               |
|--------------|-------------------------------------|
| IL-extracted | 0.055                               |
| IL-extracted | 0.066                               |
|              | <b><math>0.061 \pm 0.006</math></b> |
|              |                                     |
| PG           | 0.071                               |
| PG           | 0.070                               |
| PG           | 0.064                               |
|              | <b><math>0.069 \pm 0.003</math></b> |

## Examples of Raw Data

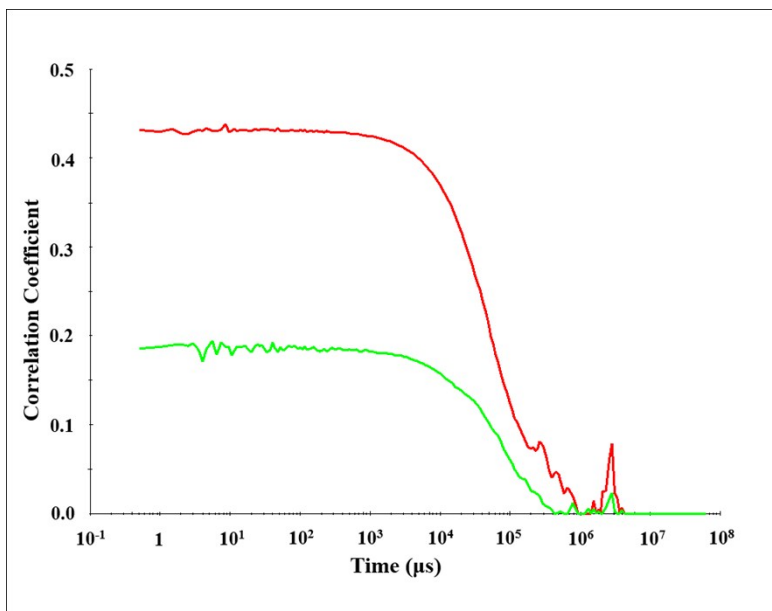

**Figure S4:** Comparison of raw correlation data and correlation coefficient for randomly chosen samples of the same concentration of IL-extracted chitin (red line) and PG-chitin (green line). Samples are the same as shown in **Figure 1 (main text)**: IL-extracted (1.0534 mg/g; red) and PG-chitin (1.0520 mg/g; green)

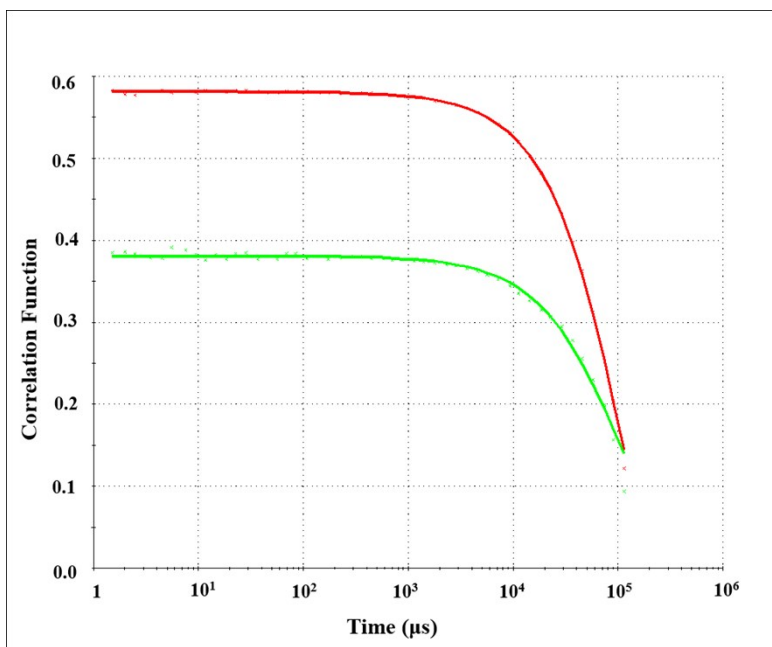

**Figure S5:** Cumulant fit for randomly chosen samples of the same concentration of IL-extracted chitin (red line) and PG-chitin (green line). Samples are the same as shown in **Figure 1 (main text)**: IL-extracted (1.0534 mg/g; red) and PG-chitin (1.0520 mg/g; green)

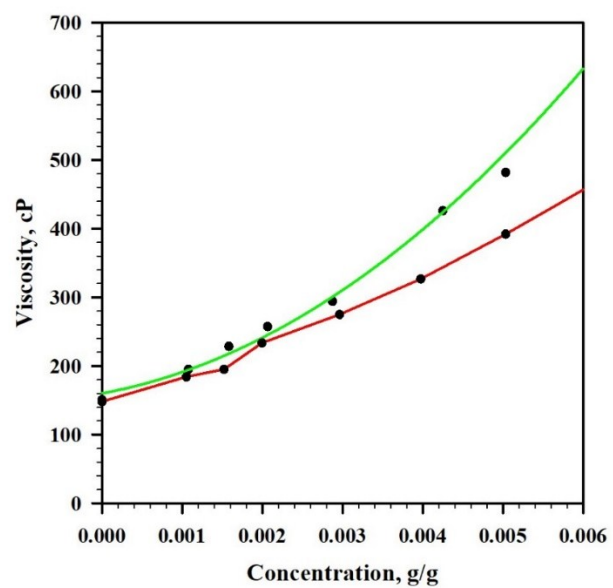

**Figure S6.** Viscosity for chitin IL-extracted (red) and PG-chitin (green) at 25 °C
